# Supplementary material for: Integrated Omics Analysis Uncovers the Culprit behind Exacerbated Atopic Dermatitis in a Diet-Induced Obesity Model
Source: MDPI journal article supplement (doi:10.3390/ijms25084143), 2024-04-09
Supplement: s1 [file s1]

# Integrated omics uncover the culprit of exacerbated atopic dermatitis in a diet-induced obesity model

You Mee Ahn<sup>1,†</sup>, Jeeyoun Jung<sup>1,†,\*</sup>, So Min Lee<sup>1</sup>

<sup>1</sup> KM Science Research Division, Korea Institute of Oriental Medicine, Daejeon 34054, Republic of Korea

\* Correspondence: [jjy0918@kiom.re.kr](mailto:jjy0918@kiom.re.kr); Tel.: +82-42-868-9272

† These authors contributed equally to this work

**Supplementary Table S1.** Description of RNA quality assessment.

| No. | Sample | Group | Nano-drop (ND 2000) |            |                       |                       | Bioanalyzer (Nano) |     |
|-----|--------|-------|---------------------|------------|-----------------------|-----------------------|--------------------|-----|
|     |        |       | ng/μl               | Total (μg) | OD <sub>260/280</sub> | OD <sub>260/230</sub> | Ratio (28s/18s)    | RIN |
| 1   | 1_1    | Sham  | 133.4               | 1.601      | 2.00                  | 1.94                  | 0.4                | 2.4 |
| 2   | 1_2    |       | 184.4               | 2.212      | 1.95                  | 1.82                  | 0.6                | 2.4 |
| 3   | 1_3    |       | 425.0               | 5.100      | 2.03                  | 2.09                  | 0.6                | 2.3 |
| 4   | 1_4    |       | 198.1               | 2.377      | 2.05                  | 2.02                  | 0.8                | 2.5 |
| 5   | 2_1    | AD    | 1701.9              | 22.125     | 2.11                  | 2.19                  | 0.1                | 2.5 |
| 6   | 2_2    |       | 3316.6              | 43.116     | 2.01                  | 2.07                  | 0.6                | 2.5 |
| 7   | 2_3    |       | 4220.4              | 54.865     | 1.62                  | 1.67                  | 0.1                | 2.5 |
| 8   | 2_4    |       | 4192.6              | 54.504     | 1.62                  | 1.69                  | 0.1                | 2.4 |
| 9   | 2_5    |       | 4258.3              | 55.358     | 1.50                  | 1.58                  | 0.1                | 2.4 |
| 10  | 3_1    | HF+AD | 4285.8              | 55.715     | 1.52                  | 1.60                  | 0.2                | 3.0 |
| 11  | 3_2    |       | 4113.7              | 53.478     | 1.72                  | 1.80                  | 0.3                | 2.8 |
| 12  | 3_3    |       | 4343.1              | 56.460     | 1.29                  | 1.39                  | 0.2                | 3.1 |
| 13  | 3_4    |       | 3871.3              | 50.327     | 1.86                  | 1.93                  | 0.1                | 2.3 |
| 14  | 3_5    |       | 4302.3              | 55.930     | 1.32                  | 1.39                  | 0.2                | 2.7 |
| 15  | 3_6    |       | 4130.5              | 53.697     | 1.74                  | 1.80                  | 0.1                | 2.5 |
| 16  | 3_7    |       | 4242.8              | 55.157     | 1.58                  | 1.62                  | 0.2                | 3.2 |

OD, optical density; RIN, RNA integrity number.

Supplementary Figure S1

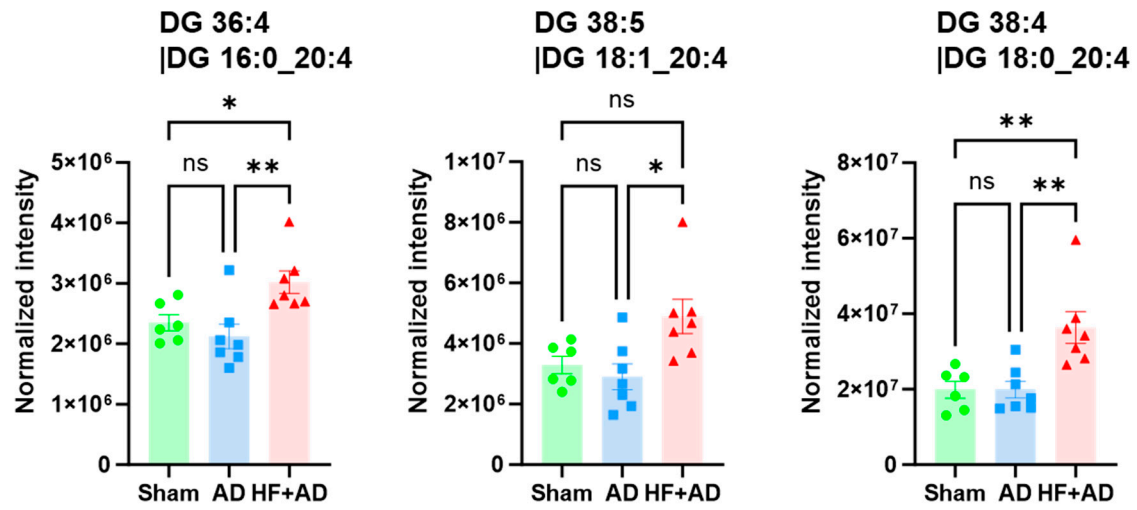

**Figure S1.** AD influences skin lipid metabolism in HF+AD mice. The alteration of DGs in 36:4, 38:5, and 38:4 including arachidonic acid (FA 20:4). \*  $p < 0.05$ , \*\*  $p < 0.01$  estimated using one-way ANOVA with Tukey's multiple comparisons tests. HF, high-fat; AD, atopic dermatitis, DG, diglyceride; ANOVA, analysis of variance.
